# Supplementary material for: The structure of a pentachromium( ii ) extended metal atom chain at 3 K: Cotton's conjecture proven
Source: Royal Society of Chemistry journal article supplement (doi:10.1039/d2dt03103e), 2022-01-01
Supplement: d2dt03103e1.pdf [file d2dt03103e1.pdf]

## ELECTRONIC SUPPLEMENTARY INFORMATION

**X-ray Crystallography.** Single crystals of **2** were obtained with the procedure described in Ref. <sup>1</sup> and were protected with vacuum grease until measurement. The selected crystal was mounted with low temperature epoxy resin to a graphite fibre to enable conduction cooling inside a vacuum chamber. Further details on the experimental setup have been described elsewhere.<sup>2</sup>

The most intense peaks in the diffraction pattern fit a tetragonal body-centered lattice with unit cell vectors ( $\mathbf{a}_I$ ,  $\mathbf{b}_I$ ,  $\mathbf{c}_I$ ) similar to those reported by Peng's group ( $a_I = b_I \sim 10.8 \text{ \AA}$ ,  $c_I \sim 26.2 \text{ \AA}$  at room temperature).<sup>3</sup> Solution and refinement in space-group  $I4/m$  indeed affords the heavily disordered structure published by these authors.<sup>3</sup> Full indexing requires a primitive tetragonal lattice ( $\mathbf{a}_P$ ,  $\mathbf{b}_P$ ,  $\mathbf{c}_P$ ) with  $a_P = b_P = a_I/\sqrt{2} \sim 15.3 \text{ \AA}$ ,  $c_I = c_P$ , and  $\mathbf{a}_P$  and  $\mathbf{b}_P$  directed along the bisectors of  $\mathbf{a}_I$  and  $\mathbf{b}_I$ . However, systematic absences ( $hkl$ :  $h+l$  and  $k+l$  odd) are impossible for a tetragonal space group. Furthermore, among  $hk0$  reflections only those with even  $h$  and  $k$  are observed, while  $00l$  is of course observed only for even  $l$ . Monoclinic space-group  $A2/a$  ( $z$  unique axis) pseudomerohedrally twinned by  $90^\circ$  rotation along  $z$  gives exactly such systematic absences. Due to twinning, reflection  $hkl$  overlaps with  $k-hl$  and this adds intensity to the reflections of the prime component with  $k+l =$  odd, unless  $h+l$  is also odd. An  $a$ -type glide plane combined with an  $A$  lattice requires  $h$  and  $k$  to be even in observable  $hk0$  reflections. Since twinning overlaps  $hk0$  with  $k-h0$ , this condition remains valid also for the twinned sample. An obvious relabelling of unit cell axes to have  $y$  as the unique axis leads to space group  $C2/c$ , which was used for the final integration of data collection frames.

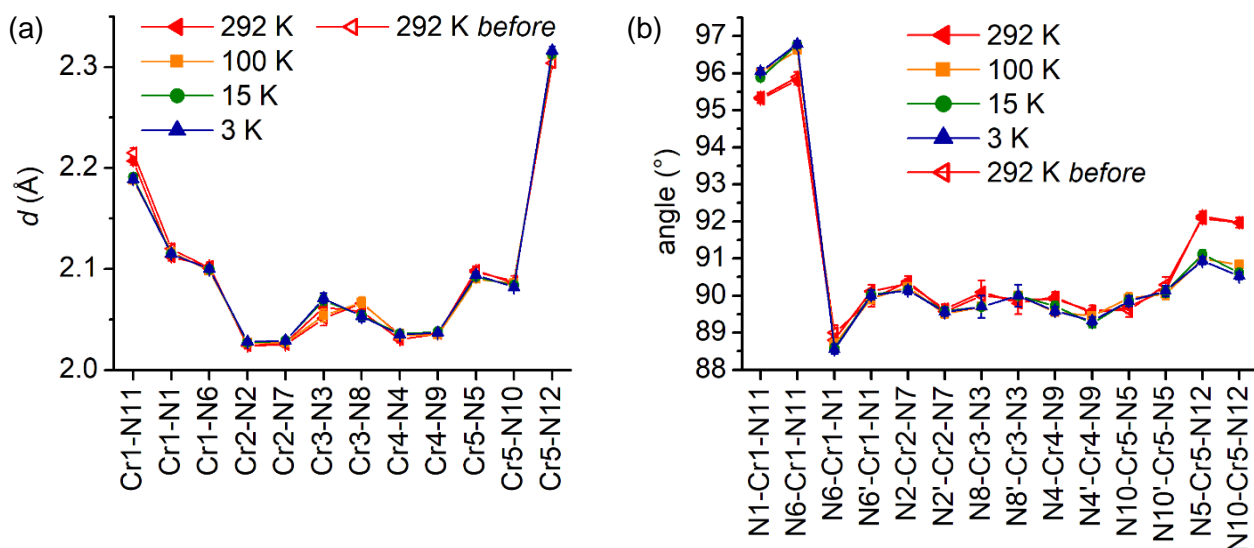

**Fig. S1** (a) Cr-N distances and (b) *cis* N-Cr-N angles in **2** at different temperatures.

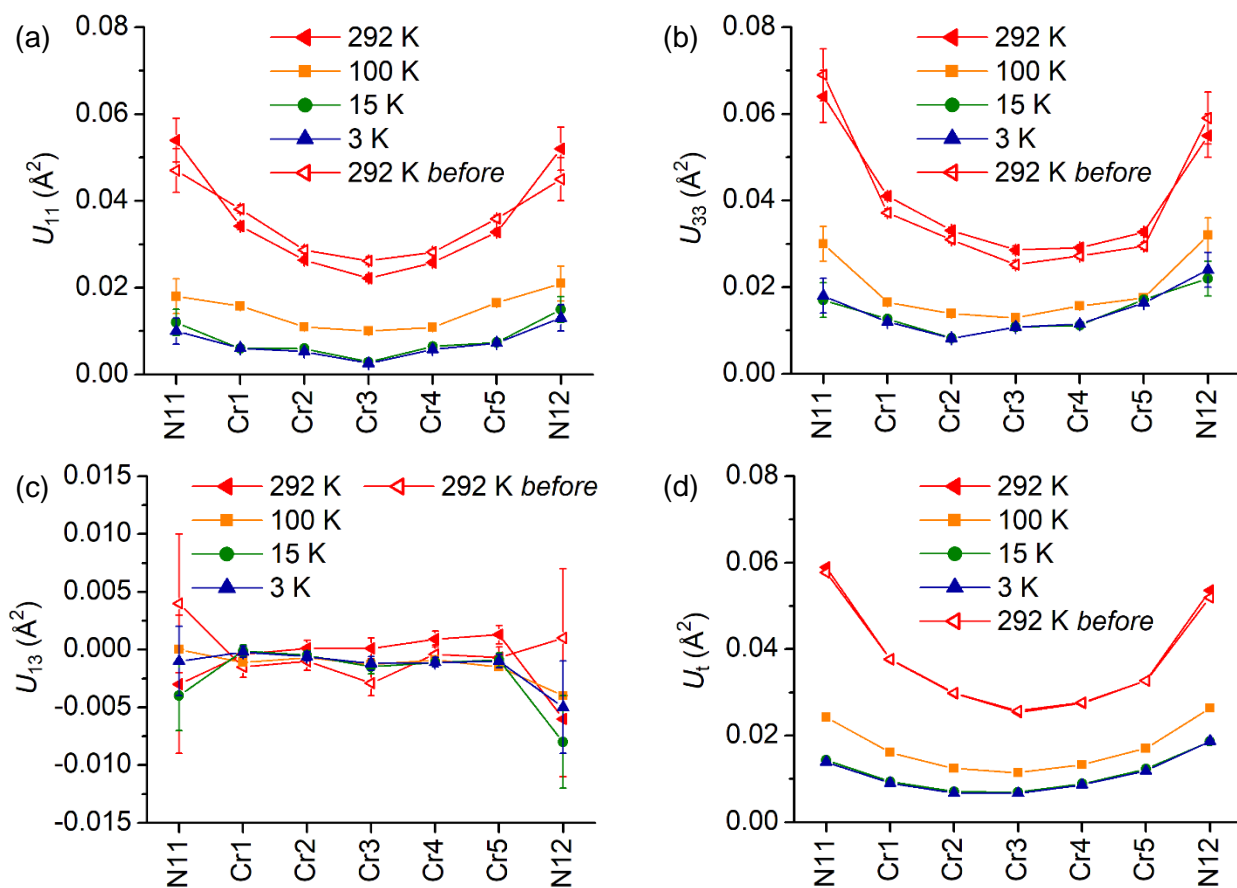

**Fig. S2** (a)  $U_{11}$ , (b)  $U_{33}$ , (c)  $U_{13}$ , and (d)  $U_t$  values for metal atoms, N11, and N12 in **2** at different temperatures.  $U_t$  was obtained by averaging the principal mean-square atomic displacements orthogonal to  $y$ . Notice that  $U_{12} = U_{23} = 0$  by symmetry.

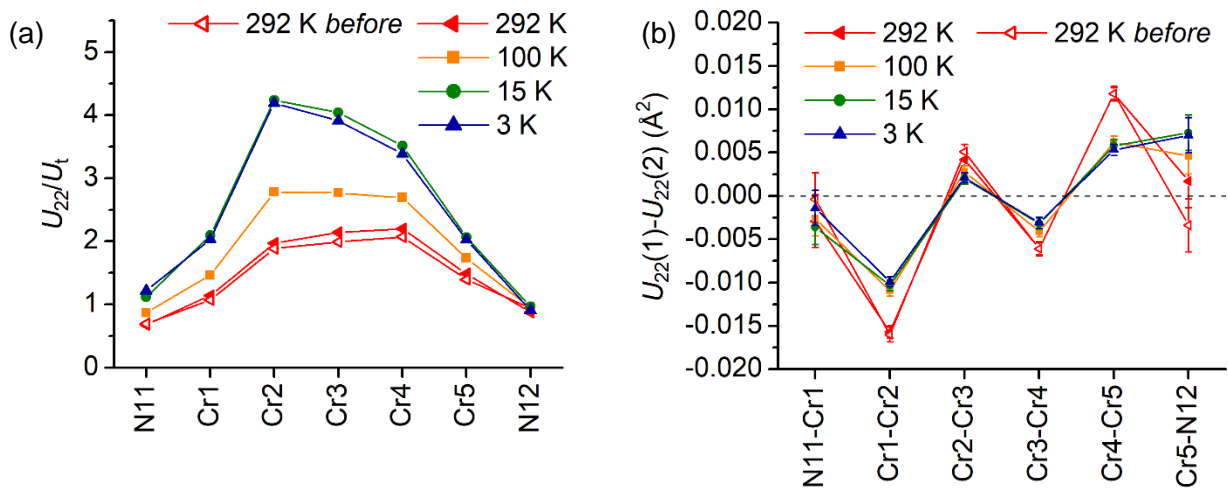

**Fig. S3** (a) Prolateness of displacement ellipsoids and (b) difference between  $U_{22}$  values of neighbouring atoms in **2** at different temperatures.

**Table S1** Crystal data and refinement parameters for **2** at different temperatures.

|                                             |                             |              |              |              |                  |
|---------------------------------------------|-----------------------------|--------------|--------------|--------------|------------------|
| formula                                     | $C_{62}H_{44}Cr_5N_{22}S_2$ |              |              |              |                  |
| $M$ (g mol <sup>-1</sup> )                  | 1421.31                     |              |              |              |                  |
| $T$ (K)                                     | 292 <sup>a</sup>            | 100          | 15           | 3            | 292 <sup>b</sup> |
| crystal system                              | monoclinic                  |              |              |              |                  |
| space group                                 | $C2/c$ (No. 15)             |              |              |              |                  |
| $a$ (Å)                                     | 15.2547(4)                  | 15.1037(4)   | 15.0601(4)   | 15.0605(4)   | 15.2426(3)       |
| $b$ (Å)                                     | 26.2195(8)                  | 26.1632(8)   | 26.1633(7)   | 26.1672(7)   | 26.2039(7)       |
| $c$ (Å)                                     | 15.2032(4)                  | 15.0198(4)   | 14.9768(4)   | 14.9728(4)   | 15.2056(3)       |
| $\alpha$ (°)                                | 90.000                      |              |              |              |                  |
| $\beta$ (°)                                 | 90.0121(16)                 | 90.0189(16)  | 90.0266(16)  | 90.023(2)    | 90.0060(10)      |
| $\gamma$ (°)                                | 90.000                      |              |              |              |                  |
| $V$ (Å <sup>3</sup> )                       | 6080.8(3)                   | 5935.2(3)    | 5901.2(3)    | 5900.6(3)    | 6073.4(2)        |
| $Z$                                         | 4                           |              |              |              |                  |
| $\rho_{\text{calcd}}$ (g cm <sup>-3</sup> ) | 1.553                       | 1.591        | 1.600        | 1.600        | 1.554            |
| crystal size (mm <sup>3</sup> )             | 0.38×0.25×0.25              |              |              |              |                  |
| $\lambda$ (Å)                               | 0.71073                     |              |              |              |                  |
| $\mu$ (mm <sup>-1</sup> )                   | 0.996                       | 1.020        | 1.026        | 1.026        | 0.997            |
| $\theta_{\text{max}}$ (°)                   | 26.382                      | 26.364       | 26.377       | 26.376       | 26.368           |
| refls. coll./indep.                         | 5214/5214                   | 5092/5092    | 5069/5069    | 5064/5064    | 5213/5213        |
| params./restrs.                             | 417/466                     |              |              |              |                  |
| $R1$                                        | 0.0704                      | 0.0426       | 0.0420       | 0.0413       | 0.0564           |
| $wR2$                                       | 0.1585                      | 0.1008       | 0.1023       | 0.1005       | 0.1159           |
| $R1 [I > 2\sigma(I)]$                       | 0.0506                      | 0.0335       | 0.0349       | 0.0343       | 0.0360           |
| $wR2 [I > 2\sigma(I)]$                      | 0.1344                      | 0.0921       | 0.0961       | 0.0942       | 0.0985           |
| GOF                                         | 1.061                       | 1.042        | 1.051        | 1.050        | 1.016            |
| res. max/min (eÅ <sup>-3</sup> )            | 0.706/−1.047                | 0.789/−1.158 | 0.795/−1.064 | 0.754/−1.042 | 0.299/−0.833     |

<sup>a</sup>Before cooling down. <sup>b</sup>After cooling down.

**Table S2** Cr-N distances (Å) in **2** at different temperatures (K).

| <i>T</i>         | Cr1-N11 <sup>a</sup> | Cr1-N1   | Cr1-N6   | Cr2-N2   | Cr2-N7   | Cr3-N3   | Cr3-N8   | Cr4-N4   | Cr4-N9   | Cr5-N5   | Cr5-N10  | Cr5-N12 <sup>a</sup> |
|------------------|----------------------|----------|----------|----------|----------|----------|----------|----------|----------|----------|----------|----------------------|
| 292 <sup>b</sup> | 2.215(5)             | 2.120(5) | 2.101(5) | 2.024(3) | 2.025(3) | 2.051(7) | 2.066(6) | 2.035(3) | 2.036(3) | 2.097(5) | 2.088(5) | 2.304(5)             |
| 3                | 2.189(4)             | 2.115(3) | 2.100(3) | 2.028(2) | 2.029(2) | 2.071(5) | 2.053(5) | 2.035(2) | 2.037(2) | 2.094(3) | 2.082(3) | 2.316(4)             |
| 15               | 2.191(4)             | 2.115(3) | 2.100(3) | 2.027(2) | 2.029(2) | 2.069(5) | 2.054(5) | 2.036(2) | 2.038(2) | 2.092(3) | 2.084(3) | 2.313(4)             |
| 100              | 2.188(4)             | 2.117(3) | 2.098(3) | 2.027(2) | 2.027(2) | 2.054(6) | 2.067(5) | 2.034(2) | 2.035(2) | 2.090(3) | 2.086(3) | 2.312(4)             |
| 292 <sup>c</sup> | 2.207(4)             | 2.112(4) | 2.103(4) | 2.024(3) | 2.027(3) | 2.062(6) | 2.058(6) | 2.030(3) | 2.036(3) | 2.099(4) | 2.086(4) | 2.304(4)             |

<sup>a</sup>Nitrogen donor of isothiocyanato ligand. <sup>b</sup>Before cooling down. <sup>c</sup>After cooling down.

**Table S3** Deviation (Å) of Cr atoms from the mean plane through their equatorial N donors in **2** at different temperatures (K).<sup>a</sup>

| <i>T</i>         | Cr1         | Cr2        | Cr3         | Cr4        | Cr5        |
|------------------|-------------|------------|-------------|------------|------------|
| 292 <sup>b</sup> | -0.2067(21) | 0.0412(20) | -0.0634(21) | 0.1363(20) | 0.0741(21) |
| 3                | -0.2352(16) | 0.1031(16) | -0.1102(17) | 0.1986(16) | 0.0267(16) |
| 15               | -0.2321(16) | 0.0978(16) | -0.1054(17) | 0.1936(16) | 0.0317(16) |
| 100              | -0.2318(16) | 0.0961(16) | -0.1052(17) | 0.1900(16) | 0.0333(16) |
| 292 <sup>c</sup> | -0.2043(18) | 0.0429(17) | -0.0627(19) | 0.1356(17) | 0.0753(18) |

<sup>a</sup>A positive deviation is a displacement along the Cr1-Cr5 vector. <sup>b</sup>Before cooling down. <sup>c</sup>After cooling down.

**Table S4** Mean-square displacement amplitudes ( $\text{\AA}^2$ ) in **2** at different temperatures (K).<sup>a</sup>

| $T$              | $U_{11}(\text{N11}^b)$ | $U_{11}(\text{Cr1})$ | $U_{11}(\text{Cr2})$ | $U_{11}(\text{Cr3})$ | $U_{11}(\text{Cr4})$ | $U_{11}(\text{Cr5})$ | $U_{11}(\text{N12}^b)$ |
|------------------|------------------------|----------------------|----------------------|----------------------|----------------------|----------------------|------------------------|
| 292 <sup>c</sup> | 0.047(5)               | 0.0381(9)            | 0.0287(8)            | 0.0262(9)            | 0.0282(7)            | 0.0359(8)            | 0.045(5)               |
| 3                | 0.010(3)               | 0.0061(5)            | 0.0053(4)            | 0.0026(6)            | 0.0058(4)            | 0.0073(5)            | 0.013(3)               |
| 15               | 0.012(3)               | 0.0060(5)            | 0.0060(4)            | 0.0029(6)            | 0.0065(5)            | 0.0074(5)            | 0.015(3)               |
| 100              | 0.018(4)               | 0.0158(6)            | 0.0110(5)            | 0.0100(7)            | 0.0109(5)            | 0.0165(6)            | 0.021(4)               |
| 292 <sup>d</sup> | 0.054(5)               | 0.0342(8)            | 0.0264(7)            | 0.0222(8)            | 0.0258(7)            | 0.0328(8)            | 0.052(5)               |

  

| $T$              | $U_{22}(\text{N11}^b)$ | $U_{22}(\text{Cr1})$ | $U_{22}(\text{Cr2})$ | $U_{22}(\text{Cr3})$ | $U_{22}(\text{Cr4})$ | $U_{22}(\text{Cr5})$ | $U_{22}(\text{N12}^b)$ |
|------------------|------------------------|----------------------|----------------------|----------------------|----------------------|----------------------|------------------------|
| 292 <sup>c</sup> | 0.040(3)               | 0.0404(6)            | 0.0564(6)            | 0.0513(6)            | 0.0574(6)            | 0.0456(6)            | 0.049(3)               |
| 3                | 0.017(2)               | 0.0184(4)            | 0.0283(4)            | 0.0262(4)            | 0.0293(5)            | 0.0240(4)            | 0.017(2)               |
| 15               | 0.016(2)               | 0.0196(4)            | 0.0299(5)            | 0.0279(4)            | 0.0311(5)            | 0.0253(5)            | 0.018(2)               |
| 100              | 0.021(2)               | 0.0236(4)            | 0.0345(5)            | 0.0317(4)            | 0.0358(5)            | 0.0296(5)            | 0.025(2)               |
| 292 <sup>d</sup> | 0.040(3)               | 0.0429(5)            | 0.0586(5)            | 0.0544(5)            | 0.0605(5)            | 0.0487(5)            | 0.047(3)               |

  

| $T$              | $U_{33}(\text{N11}^b)$ | $U_{33}(\text{Cr1})$ | $U_{33}(\text{Cr2})$ | $U_{33}(\text{Cr3})$ | $U_{33}(\text{Cr4})$ | $U_{33}(\text{Cr5})$ | $U_{33}(\text{N12}^b)$ |
|------------------|------------------------|----------------------|----------------------|----------------------|----------------------|----------------------|------------------------|
| 292 <sup>c</sup> | 0.069(6)               | 0.0372(9)            | 0.0310(8)            | 0.0252(9)            | 0.0272(7)            | 0.0295(8)            | 0.059(6)               |
| 3                | 0.018(4)               | 0.0120(6)            | 0.0082(5)            | 0.0108(7)            | 0.0115(5)            | 0.0164(6)            | 0.024(4)               |
| 15               | 0.017(4)               | 0.0127(6)            | 0.0082(5)            | 0.0108(7)            | 0.0112(5)            | 0.0171(6)            | 0.022(4)               |
| 100              | 0.030(4)               | 0.0165(6)            | 0.0139(5)            | 0.0129(7)            | 0.0157(5)            | 0.0175(6)            | 0.032(4)               |
| 292 <sup>d</sup> | 0.064(6)               | 0.0410(9)            | 0.0331(7)            | 0.0286(9)            | 0.0291(7)            | 0.0327(8)            | 0.055(5)               |

  

| $T$              | $U_{13}(\text{N11}^b)$ | $U_{13}(\text{Cr1})$ | $U_{13}(\text{Cr2})$ | $U_{13}(\text{Cr3})$ | $U_{13}(\text{Cr4})$ | $U_{13}(\text{Cr5})$ | $U_{13}(\text{N12}^b)$ |
|------------------|------------------------|----------------------|----------------------|----------------------|----------------------|----------------------|------------------------|
| 292 <sup>c</sup> | 0.004(6)               | -0.0015(9)           | -0.0010(8)           | -0.0029(11)          | -0.0004(8)           | -0.0007(9)           | 0.001(6)               |
| 3                | -0.001(3)              | -0.0002(5)           | -0.0006(4)           | -0.0012(6)           | -0.0011(4)           | -0.0010(6)           | -0.005(4)              |
| 15               | -0.004(3)              | -0.0001(5)           | -0.0005(4)           | -0.0015(6)           | -0.0011(4)           | -0.0009(6)           | -0.008(4)              |
| 100              | 0.000(4)               | -0.0011(6)           | -0.0007(4)           | -0.0013(6)           | -0.0009(4)           | -0.0015(6)           | -0.004(4)              |
| 292 <sup>d</sup> | -0.003(6)              | -0.0004(8)           | 0.0001(7)            | 0.0001(9)            | 0.0009(7)            | 0.0013(8)            | -0.006(5)              |

  

| $T$              | $U_{\parallel}(\text{N11}^b)$ | $U_{\parallel}(\text{Cr1})$ | $U_{\parallel}(\text{Cr2})$ | $U_{\parallel}(\text{Cr3})$ | $U_{\parallel}(\text{Cr4})$ | $U_{\parallel}(\text{Cr5})$ | $U_{\parallel}(\text{N12}^b)$ |
|------------------|-------------------------------|-----------------------------|-----------------------------|-----------------------------|-----------------------------|-----------------------------|-------------------------------|
| 292 <sup>c</sup> | 0.0577                        | 0.0377                      | 0.0299                      | 0.02575                     | 0.0277                      | 0.0327                      | 0.05195                       |
| 3                | 0.01395                       | 0.00905                     | 0.00675                     | 0.0067                      | 0.00865                     | 0.01185                     | 0.01875                       |
| 15               | 0.01435                       | 0.00935                     | 0.00705                     | 0.0069                      | 0.00885                     | 0.01225                     | 0.01865                       |
| 100              | 0.0242                        | 0.0161                      | 0.0124                      | 0.01145                     | 0.0133                      | 0.01705                     | 0.02635                       |
| 292 <sup>d</sup> | 0.05895                       | 0.0376                      | 0.02975                     | 0.0254                      | 0.0275                      | 0.03275                     | 0.0536                        |

<sup>a</sup>By symmetry,  $U_{12} = U_{23} = 0$  and  $U_{22}$  is a principal component of the  $U$ -tensor. <sup>b</sup>Nitrogen donor of isothiocyanato ligand. <sup>c</sup>Before cooling down. <sup>d</sup>After cooling down.

## References

- 1 A. Cornia, A.-L. Barra, V. Bulicanu, R. Clérac, M. Cortijo, E. A. Hillard, R. Galavotti, A. Lunghi, A. Nicolini, M. Rouzières, L. Sorace and F. Totti, *Inorg. Chem.*, 2020, **59**, 1763–1777.
- 2 M. R. Probert, C. M. Robertson, J. A. Coome, J. A. K. Howard, B. C. Michell and A. E. Goeta, *J. Appl. Crystallogr.*, 2010, **43**, 1415–1418.
- 3 H. Chang, J. Li, C. Wang, T. Lin, H.-C. Lee, G. Lee and S. Peng, *Eur. J. Inorg. Chem.*, 1999, **1999**, 1243–1251.
